# Supplementary material for: Plant Reproductive Success Mediated by Nectar Offered to Pollinators and Defensive Ants in Terrestrial Bromeliaceae
Source: MDPI journal article supplement (doi:10.3390/plants13040493), 2024-02-08
Supplement: s1 [file s1]

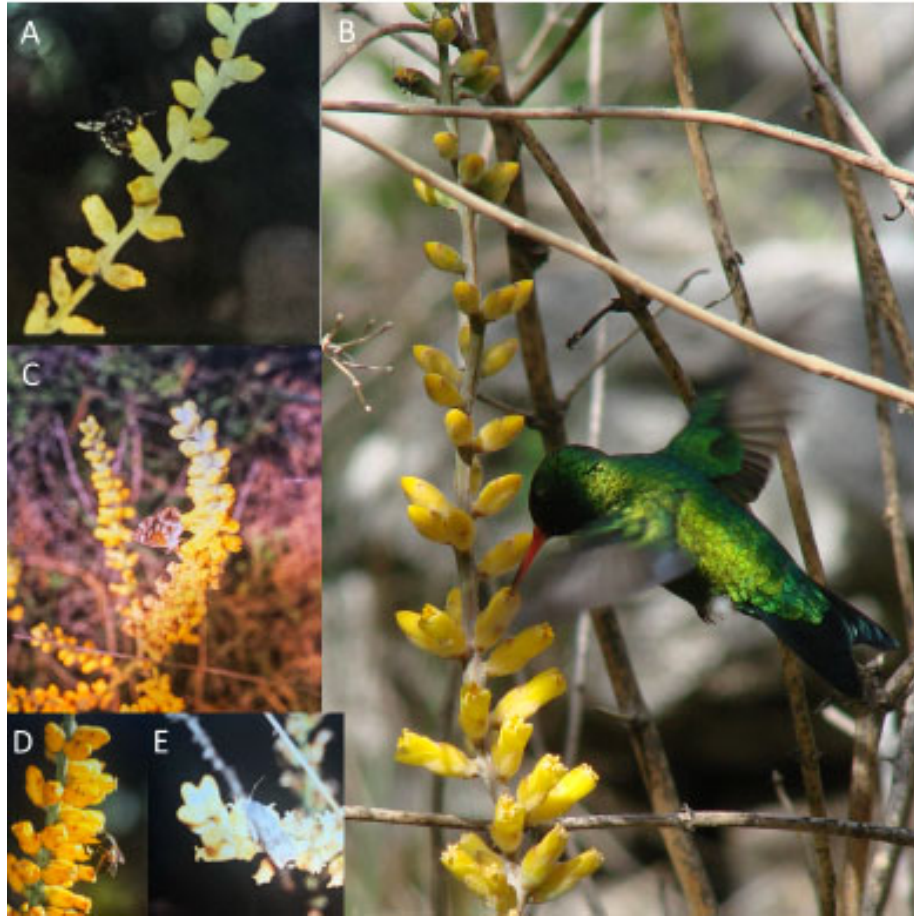

**Figure S1.** Pollinators visiting flowers for floral nectar and or pollen in *Dyckia floribunda*. (A). *Xylocopa* sp. (B). *Chlorostilbon lucidus*. (C). *Vanessa* sp. (D). *Apis mellifera*. (E). A moth, representative of Noctuidae.
